# Supplementary material for: Anticancer Effect of STING Agonist-Encapsulated Liposomes on Breast Cancer
Source: MDPI journal article supplement (doi:10.3390/molecules28093740), 2023-04-26
Supplement: s1 [file s1]

## Supplementary Material

### *Preparation of LNPs, dLNPs, and ICG-LNPs*

The anhydrous ethanol solution was quickly injected into the swirling ammonium sulfate solution (250 mM, 65°C) using a syringe with a 0.33 mm needle and then heated in a water bath at 65°C with stirring for 30 min. Subsequently, ethanol was removed from the liposomes using a dialysis bag (300 KD), in which ammonium sulfate was used as dialysate. Afterward, the liposomes were repeatedly extruded 21 times using a liposome extruder loaded with polycarbonate membranes of 200 nm, 100 nm, and 50 nm (Avanti, USA) in turn. Eventually, empty liposome nanoparticles (LNPs) were obtained.

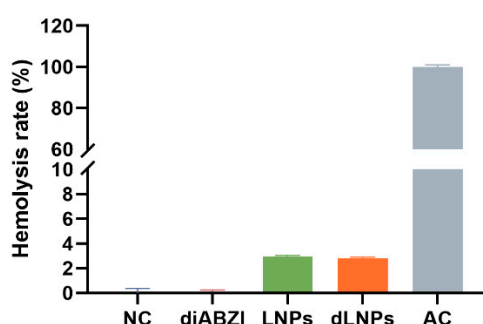

**Figure S1.** Hemolysis rate of dLNPs

### *Primers used in this study*

Sequences for primers (listed 5' to 3')

$\beta$ -actin F: GGCACCACACCTTCTACAATG

$\beta$ -actin R: GAGGCATACAGGGACAGCAC

IFN- $\beta$  F: CCACAGCCCTCTCCATCAACT

IFN- $\beta$  R: TGGATGGCAAAGGCAGTGTA
